# Supplementary material
Source: PubMed Central journal article supplement (PMC4598822)
Supplement: ja5b07416_si_001.pdf [file ja5b07416_si_001.pdf]

# Confinement, desolvation and electrosorption effects on the diffusion of ions in nanoporous carbon electrodes

Clarisse Péan,<sup>†,‡,¶</sup> Barbara Daffos,<sup>‡,¶</sup> Benjamin Rotenberg,<sup>†,¶</sup> Pierre Levitz,<sup>†</sup> Matthieu Haefele,<sup>§</sup> Pierre-Louis Taberna,<sup>‡,¶</sup> Patrice Simon,<sup>‡,¶</sup> and Mathieu Salanne,<sup>†,¶,§</sup>

<sup>†</sup>*Sorbonne Universités, UPMC Univ Paris 06, CNRS, Laboratoire PHENIX, F-75005, Paris, France,* <sup>‡</sup>*CIRIMAT, UMR CNRS 5085, Université Paul Sabatier, Bat. 2R1, 118 route de Narbonne, 31062 Toulouse Cedex 9, France,* <sup>¶</sup>*Réseau sur le Stockage Electrochimique de l'Energie (RS2E), FR CNRS 3459, France,* and <sup>§</sup>*Maison de la Simulation, USR 3441, CEA-CNRS - INRIA - Université Paris-Sud - Université de Versailles, F-91191 Gif-sur-Yvette, France*

## Supporting Information

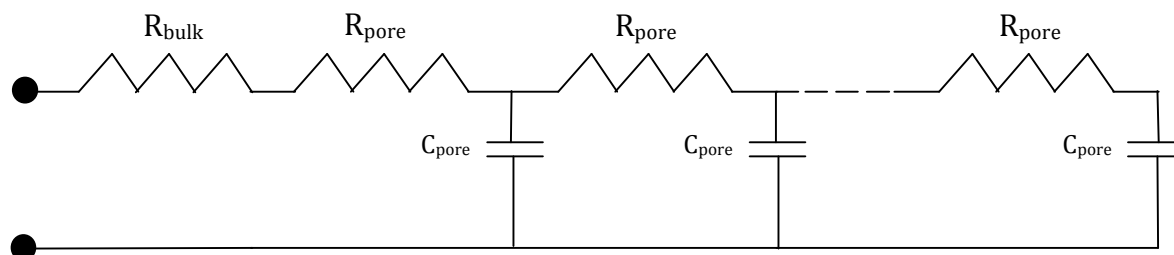

**Supplementary Figure S1** : Equivalent circuit (transmission line model) of a porous carbon electrode. The bulk electrolyte is represented by the resistance  $R_{bulk}$  while the electrodes are represented by an infinite series of resistances  $R_{pore}$  and capacitors  $C_{pore}$ .

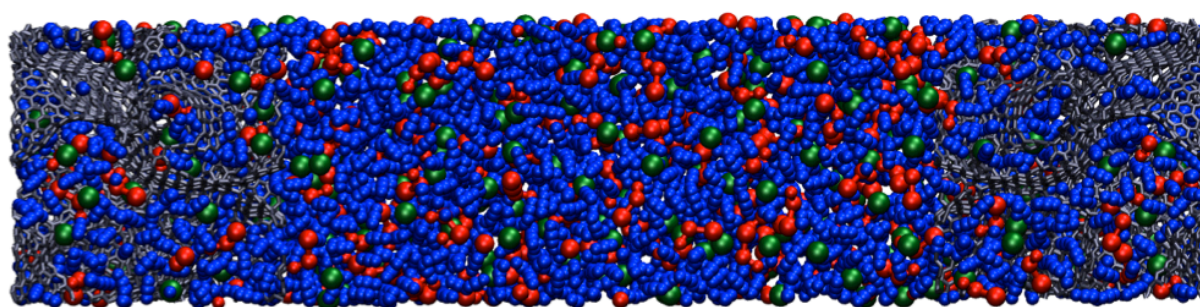

**Supplementary Figure S2.** The simulation cells consist of an electrolyte surrounded by two porous carbon electrodes. The electrolyte is a 1.5 M solution of BMIM-PF<sub>6</sub> dissolved in acetonitrile) and the porous carbon mimics a carbide-derive carbon with an average pore size of 0.9 nm. The lateral dimension of each electrode is of 4.4 nm, while the distance between them is 24 nm. Anions are colored in green, cations in red, acetonitrile in blue and carbon atoms in gray.

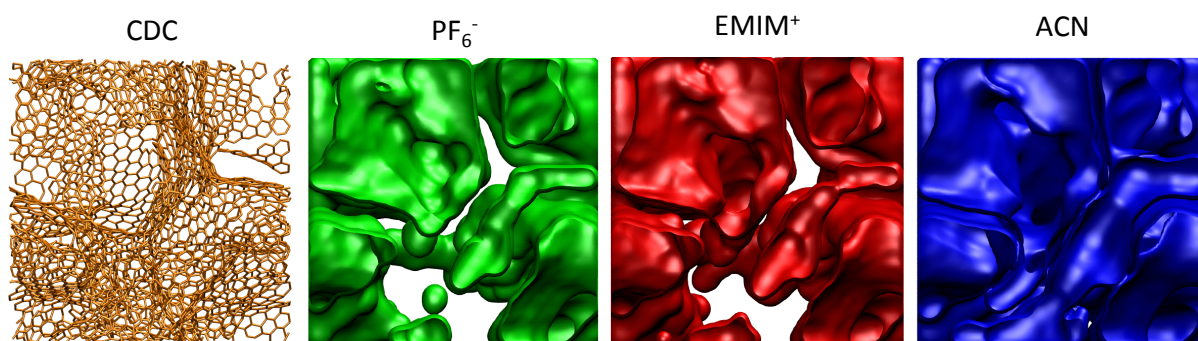

**Supplementary Figure S3** : Accessible volume for the electrolyte species inside the electrodes. Volumetric representation of the positions which have been occupied by the center of mass of each molecule type during our simulations.

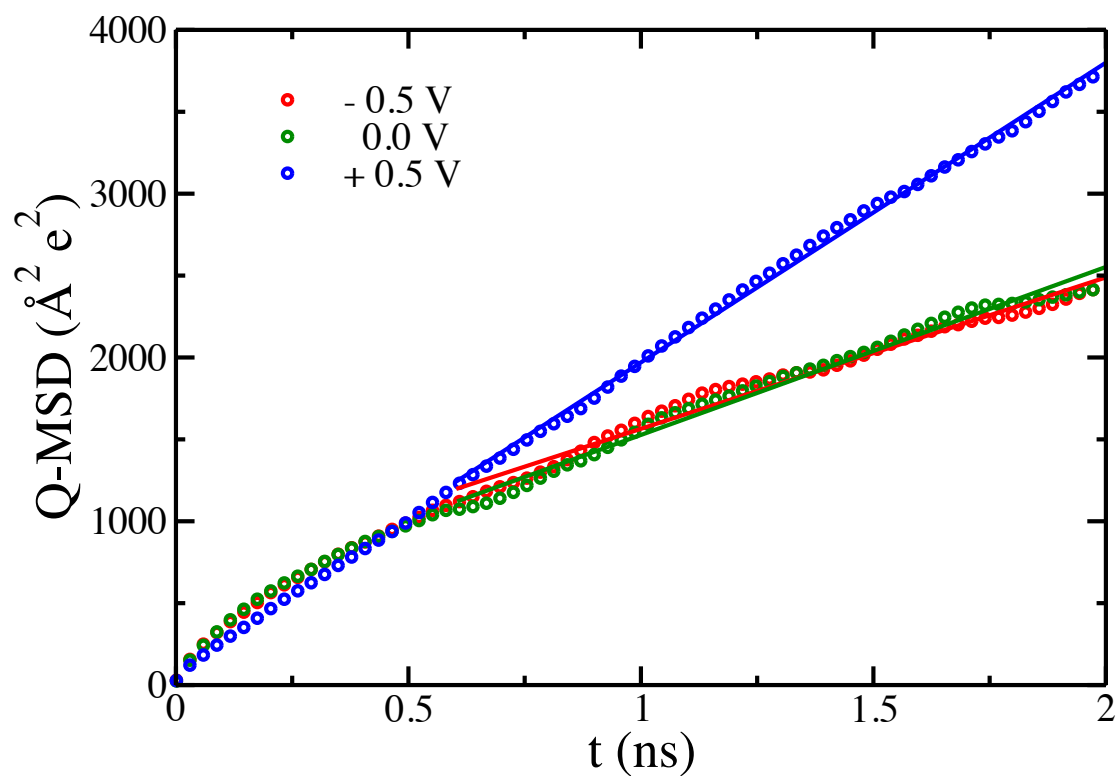

**Supplementary Figure S4** : The plotted quantity is the sum in the right-hand term of Equation 3. The in-pore conductivities are extracted from the linear régime (shown using straight lines).
